# Supplementary material for: AdoR-1 (Adenosine Receptor) Contributes to Protection against Paraquat-Induced Oxidative Stress in Caenorhabditis elegans
Source: Oxid Med Cell Longev. 2022 Dec 22;2022:1759009. doi: 10.1155/2022/1759009 (PMC9800083; doi:10.1155/2022/1759009)
Supplement: Supplementary Materials — Figure S1: protein–protein interaction network of the genes identified by qRT-PCR in this study. Table S1: summary of data quality assessment. Table S2: high-frequency gene families and their functions in the five GO categories. Table S3: prediction of protein ADOR-1-associated protein. [file 1759009.f1.zip]

Archive with 4 entries (4 files):
- Supplementary Figure S1 (1).docx
- Supplementary Table S1.docx
- Supplementary Table S2.docx
- Supplementary Table S3.docx
